# Supplementary material for: Nickel nanoparticle-induced cell transformation: involvement of DNA damage and DNA repair defect through HIF-1α/miR-210/Rad52 pathway
Source: PubMed Central journal article supplement (PMC8600818; doi:10.1186/s12951-021-01117-7), 2021-11-17

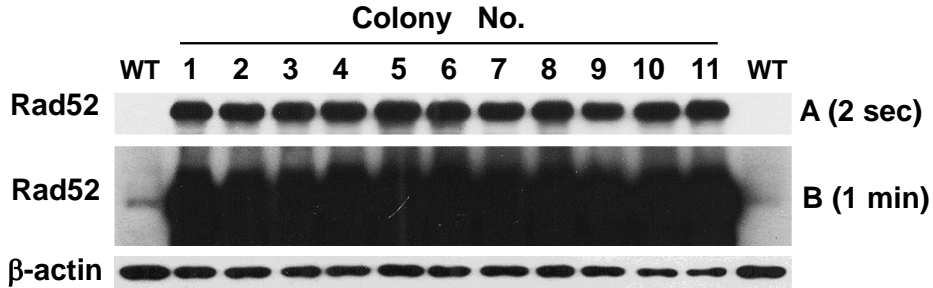

Supplement: 12951_2021_1117_MOESM2_ESM.pdf [file 12951_2021_1117_MOESM2_ESM.pdf]
